# Supplementary material
Source: ML conference proceedings conference paper supplement (https://proceedings.mlr.press/v28/baktashmotlagh13.html)
Supplement: Supplementary file 1 [file baktashmotlagh13-supp.pdf]

---

# Supplementary Material: Non-Linear Stationary Subspace Analysis with Application to Video Classification

---

Mahsa Baktashmotlagh<sup>†‡</sup>

MAHSA.BAKTASHMOTLAGH@NICTA.COM.AU

Mehrtash T. Harandi<sup>‡</sup>

MEHRTASH.HARANDI@NICTA.COM.AU

Abbas Bigdeli<sup>‡</sup>

ABBAS.BIGDELI@NICTA.COM.AU

Brian C. Lovell<sup>†</sup>

LOVELL@ITEE.UQ.EDU.AU

Mathieu Salzmann<sup>‡</sup>

MATHIEU.SALZMANN@NICTA.COM.AU

<sup>†</sup>University of Queensland, School of ITEE, QLD 4072, Australia

<sup>‡</sup>NICTA\*, Locked Bag 8001, Canberra, ACT 2601, Australia

## 1. Bounds for KSSA and NLSSA

In Analytic SSA, an approximate upper bound to the logdet term in Eq. 4 is computed (Hara et al., 2012). Without re-deriving this bound entirely, we present its final steps, which we use to obtain the bounds for KSSA and NLSSA.

Following (Hara et al., 2012), let us denote by  $\tilde{f}(\mathbf{W}, \mathbf{W}_*)$  the second order Taylor approximation of the logdet term around the optimal solution  $\mathbf{W}_*$ . It can be shown that

$$\tilde{f}(\mathbf{W}, \mathbf{W}_*) \leq \frac{2}{N} \sum_{i=1}^N \text{Tr} \left( \mathbf{W}(\boldsymbol{\Sigma}_i - \bar{\boldsymbol{\Sigma}}) \mathbf{W}_*^T \mathbf{W}_* (\boldsymbol{\Sigma}_i - \bar{\boldsymbol{\Sigma}}) \mathbf{W}^T \right).$$

Let  $\mathbf{B}_*^T = [\mathbf{W}_*^T, \mathbf{B}_*^{nT}]$ , where  $\mathbf{B}_*^n$  is the orthogonal complement of  $\mathbf{W}_*$ . Since

$$\text{Tr} \left( \mathbf{W}(\boldsymbol{\Sigma}_i - \bar{\boldsymbol{\Sigma}}) \mathbf{B}_*^{nT} \mathbf{B}_*^n (\boldsymbol{\Sigma}_i - \bar{\boldsymbol{\Sigma}}) \mathbf{W}^T \right) \geq 0,$$

the bound can be re-written as

$$\tilde{f}(\mathbf{W}, \mathbf{W}_*) \leq \frac{2}{N} \sum_{i=1}^N \text{Tr} \left( \mathbf{W}(\boldsymbol{\Sigma}_i - \bar{\boldsymbol{\Sigma}}) \mathbf{B}_*^T \mathbf{B}_* (\boldsymbol{\Sigma}_i - \bar{\boldsymbol{\Sigma}}) \mathbf{W}^T \right). \quad (1)$$

The constraint  $\mathbf{B}_* \bar{\boldsymbol{\Sigma}} \mathbf{B}_*^T = \mathbf{I}$  yields  $\mathbf{B}_*^T \mathbf{B}_* = \bar{\boldsymbol{\Sigma}}^{-1}$ , which results in the final bound

$$\tilde{f}(\mathbf{W}, \mathbf{W}_*) \leq \frac{2}{N} \sum_{i=1}^N \text{Tr} \left( \mathbf{W}(\boldsymbol{\Sigma}_i - \bar{\boldsymbol{\Sigma}}) \bar{\boldsymbol{\Sigma}}^{-1} (\boldsymbol{\Sigma}_i - \bar{\boldsymbol{\Sigma}}) \mathbf{W}^T \right).$$

**KSSA:** In kernel space, we can write  $\mathbf{W} = \boldsymbol{\alpha} \Phi(\mathbf{V})^T$ , with  $\boldsymbol{\alpha}$  unknown. Similarly, for the entire subspace at the optimal solution, we have  $\mathbf{B}_* = \hat{\boldsymbol{\alpha}}_* \Phi(\mathbf{V})^T$ , with

$\hat{\boldsymbol{\alpha}}_* = [\boldsymbol{\alpha}_*^T, \boldsymbol{\alpha}_*^{nT}]^T$  and  $\boldsymbol{\alpha}_*^n$  the coefficients of the orthogonal complement of  $\mathbf{W}_*$ . From Eq. 1, and by recalling that the covariances are now defined in kernel space, we have

$$\tilde{f}(\boldsymbol{\alpha}, \boldsymbol{\alpha}_*) \leq \frac{2}{N} \sum_{i=1}^N \text{Tr} \left( \boldsymbol{\alpha}(\tilde{\mathbf{K}}_i - \bar{\mathbf{K}}) \hat{\boldsymbol{\alpha}}_*^T \hat{\boldsymbol{\alpha}}_* (\tilde{\mathbf{K}}_i - \bar{\mathbf{K}}) \boldsymbol{\alpha}^T \right).$$

With the constraint  $\mathbf{B}_* \bar{\boldsymbol{\Sigma}} \mathbf{B}_*^T = \hat{\boldsymbol{\alpha}}_* \bar{\mathbf{K}} \hat{\boldsymbol{\alpha}}_*^T = \mathbf{I}$ , we can see that  $\hat{\boldsymbol{\alpha}}_*^T \hat{\boldsymbol{\alpha}}_* = \bar{\mathbf{K}}^{-1}$ , which yields the final bound

$$\tilde{f}(\boldsymbol{\alpha}, \boldsymbol{\alpha}_*) \leq \frac{2}{N} \sum_{i=1}^N \text{Tr} \left( \boldsymbol{\alpha}(\tilde{\mathbf{K}}_i - \bar{\mathbf{K}}) \bar{\mathbf{K}}^{-1} (\tilde{\mathbf{K}}_i - \bar{\mathbf{K}}) \boldsymbol{\alpha}^T \right).$$

**NLSSA:** The derivation of the bound for NLSSA directly follows from the fact that  $\bar{\boldsymbol{\Sigma}}^P = \mathbf{I}$ , which thus yields

$$\tilde{f}(\mathbf{W}, \mathbf{W}_*) \leq \frac{2}{N} \sum_{i=1}^N \text{Tr} \left( \mathbf{W}(\boldsymbol{\Sigma}_i^P - \mathbf{I})(\boldsymbol{\Sigma}_i^P - \mathbf{I}) \mathbf{W}^T \right).$$

Moreover, in NLSSA, we assumed that the average of the means over the epochs is 0 in  $\mathcal{H}$ . This centering can be achieved by re-writing the kernel matrix as  $\hat{\mathbf{K}} = \mathbf{K} - \mathbf{1}\mathbf{K} - \mathbf{K}\mathbf{1}^T + \mathbf{1}\mathbf{K}\mathbf{1}^T$ , where  $\mathbf{1}$  is a  $\sum_{i=1}^N m_i \times \sum_{i=1}^N m_i$  block matrix with all entries in each block  $i$  (corresponding to one video in the class) set to  $1/(N \times m_i)$ .

## References

Hara, S., Kawahara, Y., Washio, T., Bünaui, P., Tokunaga, T., and Yumoto, K. Separation of stationary and non-stationary sources with a generalized eigenvalue problem. *Neural networks*, 2012.
